# Supplementary material for: Cripto shapes macrophage plasticity and restricts EndMT in injured and diseased skeletal muscle
Source: PubMed Central journal article supplement (PMC7132341; doi:10.15252/embr.201949075), 2020-02-27
Supplement: EMBR-21-e49075-s001.pdf [file EMBR-21-e49075-s001.pdf]

## Appendix

### **Cripto shapes macrophage plasticity and restricts EndMT in injured and diseased skeletal muscle**

Francescopaolo Iavarone<sup>1</sup>, Ombretta Guardiola<sup>1</sup>, Alessandra Scagliola<sup>2</sup>, Gennaro Andolfi<sup>1</sup>, Federica Esposito<sup>1</sup>, Antonio Serrano<sup>3</sup>, Eusebio Perdiguero<sup>3</sup>, Silvia Brunelli<sup>2</sup>, Pura Muñoz-Cánoves<sup>3,4,5</sup> and Gabriella Minchiotti<sup>1\*</sup>

1. *Stem Cell Fate Laboratory, Institute of Genetics and Biophysics "A. Buzzati-Traverso", CNR, 80131, Naples, Italy.*
2. *School of Medicine and Surgery, University of Milano-Bicocca.*
3. *Cell Biology Group, Department of Experimental and Health Sciences, Pompeu Fabra University (UPF), CIBER on Neurodegenerative Diseases (CIBERNED), Barcelona, Spain.*
4. *Institució Catalana de Recerca i Estudis Avançats (ICREA), Barcelona, Spain.*
5. *Centro Nacional de Investigaciones Cardiovasculares (CNIC), Madrid, Spain.*

\*Correspondence to: Gabriella Minchiotti, [gabriella.minchiotti@igb.cnr.it](mailto:gabriella.minchiotti@igb.cnr.it)

#### **Table of contents:**

|                          |   |
|--------------------------|---|
| Appendix Figure S1 ..... | 2 |
| Appendix Figure S2 ..... | 3 |
| Appendix Figure S3 ..... | 4 |
| Appendix Figure S4 ..... | 5 |
| Appendix Table S1 .....  | 6 |
| Appendix Table S2 .....  | 7 |
| Appendix Table S3 .....  | 8 |

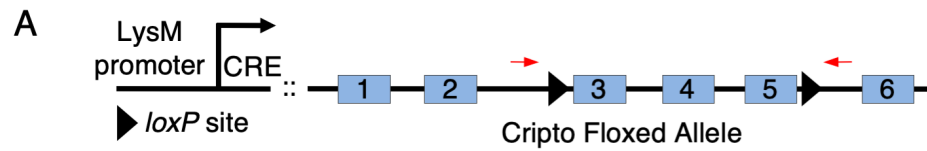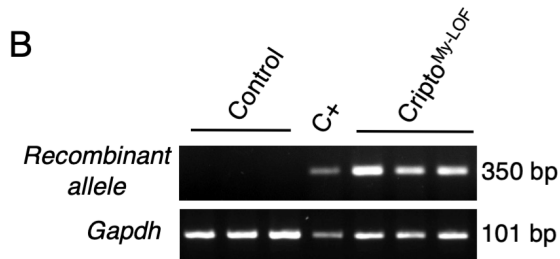

**Appendix Figure S1.**

A. Schematic representation of *Tg:LysMCre::Cripto<sup>fl/fl</sup>* (*Cripto<sup>My-LOF</sup>*) transgenic mice. Cre is under the control of the Lysozyme M (LysM) promoter and induces the tissue-specific excision of exon 3-5 in *Cripto* floxed allele. Red arrows indicate forward and reverse primers for PCR genotyping.

B. PCR genotyping on DNA extracted from CD11b<sup>+</sup> MPs FACS-isolated from *Cripto<sup>My-LOF</sup>* and Control at day 2 after injury. *Gapdh* was used as control.

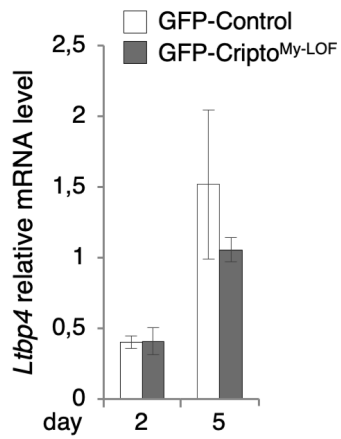

### Appendix Figure S2.

QRT-PCR analysis of *Ltbp4* in FACS-isolated GFP+ MPs from GFP-Cripto<sup>My-LOF</sup> and GFP-Control muscles at day 2 and 5 after injury. Data are mean $\pm$ SEM of relative mRNA level normalized with Gapdh (n=4 biological replicates; P=ns; Student t-test).

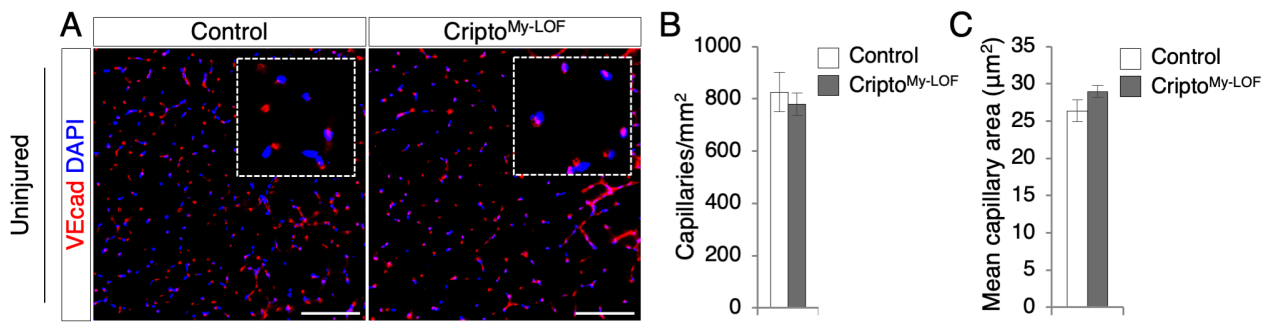

### Appendix Figure S3.

A. Representative pictures of VEcad (red) immunostaining of Cripto<sup>My-LOF</sup> and control TA sections in resting conditions. Nuclei were counterstained with DAPI (blue). Scale bar is 100  $\mu\text{m}$ . Magnification of the boxes is 3.5 x.

B-C. Quantification of VEcad+ capillary number (B) per area ( $\text{mm}^2$ ) and average of capillary cross-sectional area ( $\mu\text{m}^2$ ; C). Data are mean $\pm$ SEM (n=5 biological replicates; P=ns; Student *t*-test).

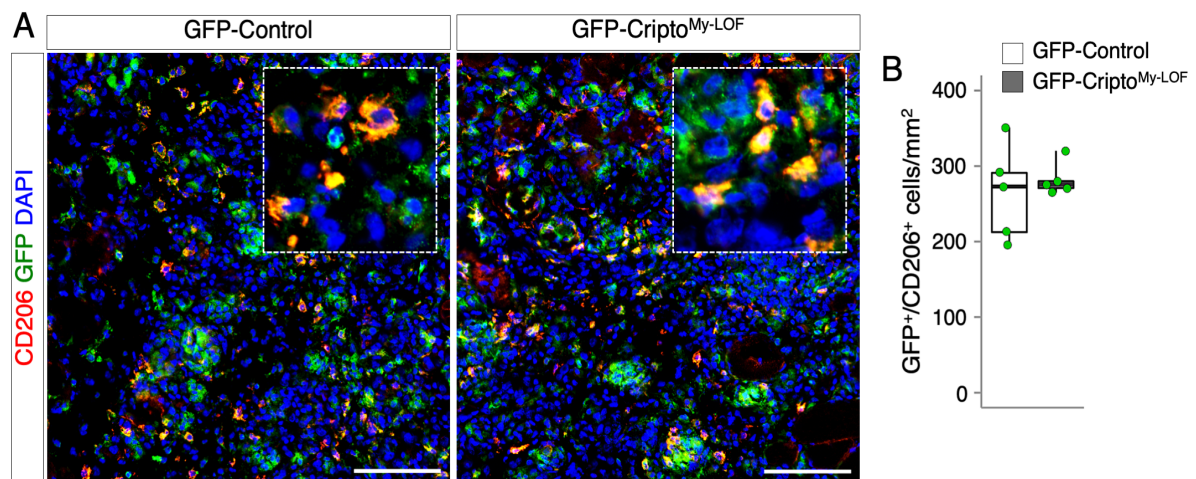

#### Appendix Figure S4.

A. Representative pictures of double immunostaining with CD206 (red) and GFP (green) on GFP-Control and GFP-Cripto<sup>My-LOF</sup> TA sections at day 3 after injury. Nuclei were counterstained with DAPI (blue). Scale bar is 100  $\mu$ m. Magnification of the boxes is 3.5 x.

B. Quantification of GFP/CD206 double positive cells per area (mm<sup>2</sup>). Data are expressed as box plots (n=5 biological replicates; P=ns; Student *t*-test).

**Appendix Table S1. The list of Primers for genotyping**

| Allele                              | Primer 1 (5'-3')         | Primer 2 (5'-3')        | PCR Amplification (bp) |
|-------------------------------------|--------------------------|-------------------------|------------------------|
| <i>Cripto</i>                       | TCTGCACTGGGGCTAAACCTTATG | GCCAAGAGCCATGACAGAGATGG | 380                    |
| <i>Cripto<sup>fl/fl</sup></i>       | TCTGCACTGGGGCTAAACCTTATG | GCCAAGAGCCATGACAGAGATGG | 580                    |
| <i>Cripto<sup>del</sup></i>         | TCTGCACTGGGGCTAAACCTTATG | CATCTGGGACATGCCCACTA    | 350                    |
| <i>LysM</i>                         | CTTGGGCTGCCAGAATTTCTC    | CCCAGAAATGCCAGATTACG    | 350                    |
| <i>LysMCre</i>                      | CTTGGGCTGCCAGAATTTCTC    | TTACAGTCGGCCAGGCTGAC    | 700                    |
| <i>R26 WT</i>                       | AAAGTCGCTCTGAGTTGTTAT    | GGAGCGGGAGAAATGGATATG   | 650                    |
| <i>R26<sup>mTmG</sup></i>           | AAAGTCGCTCTGAGTTGTTAT    | GTCGTTGGGCGGTCAG        | 250                    |
| <i>Cripto</i><br>(reference PCR)    | TACTGCTTCATCCCC          | TAGCAGCCCTAAGTGTC       | 156                    |
| <i>Cripto</i><br>(undeleted allele) | CTCCTGATGCCACTTCATGC     | GCCCATAAGCAACGGTTCAT    | 171                    |

**Appendix Table S2. The list of Primers used for qRT-PCR expression analysis**

| Gene          | Forward (5'-3')          | Reverse (5'-3')         |
|---------------|--------------------------|-------------------------|
| <i>Arg1</i>   | AGCTCCAAGCCAAAGTCCTTAGA  | CCTCCTCGAGGCTGTCCTT     |
| <i>Cripto</i> | GCATTTGGGACCAGAAAGAA     | GCGTCCATAGAAGGAAGGAG    |
| <i>Fizz1</i>  | TCCAGCTAACTATCCCTCCACTGT | GGCCCATCTGTTCATAGTCTTGA |
| <i>Gapdh</i>  | TCTTCTGGGTGGCAGTGATG     | TGCACCACCAACTGCTTAGC    |
| <i>Il10</i>   | ATTTGAATTCCTGGGTGAGAAG   | CACAGGGGAGAAATCGATGACA  |
| <i>Il4ra</i>  | CCTCTGTGGGCTGTCTGATTTT   | GGGCTCACCCAGGACCTT      |
| <i>Ltbp4</i>  | AATTTCCCCTGCCCAGCATC     | ACAAACCTGGGGATTTTCGCT   |
| <i>Mcp1</i>   | CCCAATGAGTAGGCTGGAGA     | GCTAAGACCTTAGGGCAGA     |
| <i>Nos2</i>   | AGCCAAGCCCTCACCTACTT     | TCTCTGCCTATCCGTCTCGT    |
| <i>Tgfβ</i>   | CCCCACTGATACGCCTGAGT     | AGCCCTGTATTCCGTCTCCTT   |
| <i>Tnfa</i>   | TCCAGGTTCTCTTCAAGGGA     | GGTGAGGAGCACGTAGTCGG    |

**Appendix Table S3. The list of Antibodies and their applications**

| Antibody (Clone)                        | Species | Dilution | Company (Catalog #)      | Application |
|-----------------------------------------|---------|----------|--------------------------|-------------|
| CD11b-PerCP (M1/70)                     | Rat     | 1:10     | R&D System (FAB1124C)    | FACS        |
| F4/80-APC (T45-2342)                    | Rat     | 1:100    | BD (565853)              | FACS        |
| Ly6C-PECy7 (AL-21)                      | Rat     | 1:200    | BD (560593)              | FACS        |
| Cripto-488 (237603)                     | Rat     | 1:10     | R&D System (FAB1538G)    | FACS        |
| F4/80 (Cl:A3-1)                         | Rat     | 1:25     | Bio-Rad (MCA497B)        | IF          |
| CD86 (GL1)                              | Rat     | 1:50     | BD (550542)              | IF          |
| CD206 (MR5D3)                           | Rat     | 1:200    | Bio-Rad (MCA2235)        | IF          |
| GFP                                     | Chicken | 1:1000   | Abcam (ab13970)          | IF          |
| Phospho-Smad3 (Ser423/425) (C25A9)      | Rabbit  | 1:100    | Cell Signaling (9520)    | IF          |
| CD144 (11D4.1)                          | Rat     | 1:250    | BD (550548)              | IF          |
| KLF4                                    | Goat    | 1:250    | R&D System (AF3158)      | IF          |
| TCF4 (C48H11)                           | Rabbit  | 1:100    | Cell Signaling (2569)    | IF          |
| CD31 (MEC 13.3)                         | Rat     | 1:250    | BD (553370)              | IF          |
| PDGF Receptor $\alpha$ (D13C6)          | Rabbit  | 1:100    | Cell Signaling (5241)    | IF          |
| Laminin                                 | Rabbit  | 1:400    | Sigma-Aldrich (L9393)    | IF          |
| Embryonic myosin heavy chain            | Mouse   | 1:50     | DSHB (F1.652)            | IF          |
| Pax7                                    | Mouse   | 1:20     | DSHB                     | IF          |
| Alexa Fluor 488 Donkey anti-Rat IgG     | Donkey  | 1:500    | Invitrogen (A-21208)     | IF          |
| Cy3 Donkey Anti-Rat IgG                 | Donkey  | 1:500    | Jackson IR (712-165-150) | IF          |
| Alexa Fluor 647 Goat anti-Rat IgG       | Goat    | 1:500    | Invitrogen (A-21247)     | IF          |
| Alexa Fluor 488 Donkey anti-Chicken IgY | Donkey  | 1:500    | Jackson IR (703-545-155) | IF          |
| Alexa Fluor 647 Donkey anti-Rabbit IgG  | Donkey  | 1:500    | Invitrogen (A31573)      | IF          |
| Alexa Fluor 488 Donkey anti-Rabbit IgG  | Donkey  | 1:500    | Invitrogen (A21206)      | IF          |
| Alexa Fluor 594 Donkey anti-Rabbit IgG  | Donkey  | 1:500    | Invitrogen (A21207)      | IF          |
| Alexa Fluor 488 Donkey anti-Goat IgG    | Donkey  | 1:500    | Invitrogen (A11055)      | IF          |
| Alexa Fluor 594 Donkey anti-Mouse IgG   | Donkey  | 1:500    | Invitrogen (A21203)      | IF          |
| Biotin-SP Goat anti-Mouse IgG           | Goat    | 1:500    | Jackson IR (115-065-205) | IF          |
