# Supplementary material for: Cripto shapes macrophage plasticity and restricts EndMT in injured and diseased skeletal muscle
Source: PubMed Central journal article supplement (PMC7132341; doi:10.15252/embr.201949075), 2020-02-27
Supplement: EMBR-21-e49075-s002.pdf [file EMBR-21-e49075-s002.pdf]

## Expanded View Figures

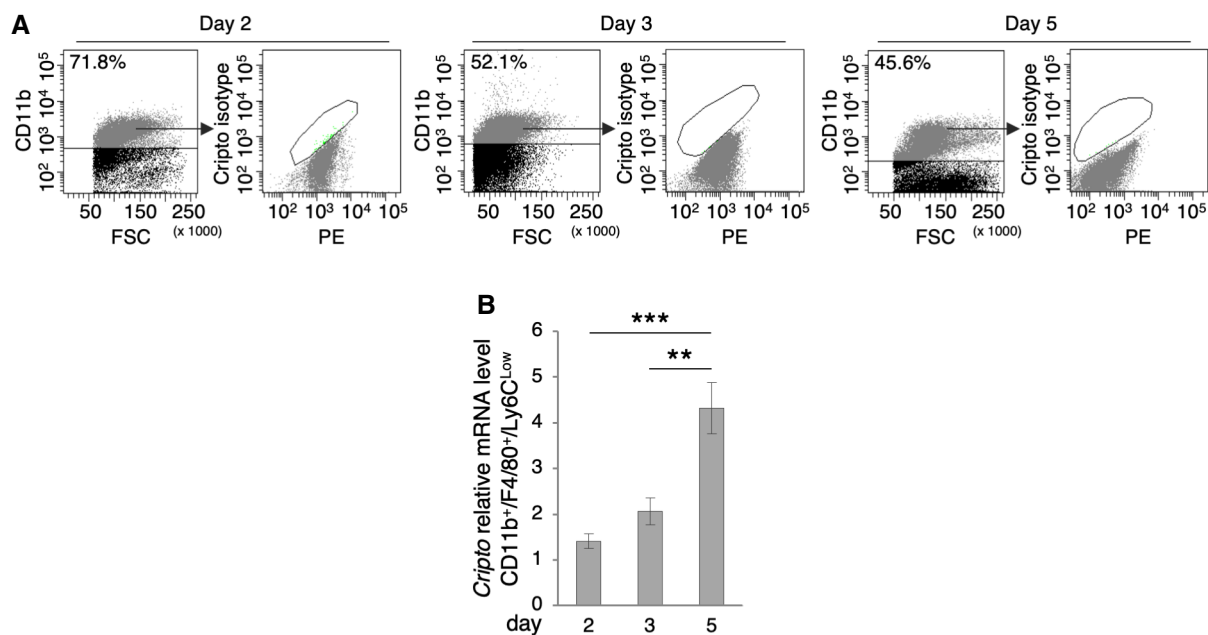

**Figure EV1. Cripto isotype control and Cripto expression by qRT-PCR.**

A Representative flow cytometry dot plots of Cripto isotype control in CD11b<sup>+</sup> cells at days 2, 3, and 5 after injury. PE (Phycoerythrin/free channel).

B Quantitative real-time PCR analysis of Cripto expression profile in CD11b<sup>+</sup>/Ly6C<sup>Low</sup> MPs at days 2, 3, and 5 after injury. Relative mRNA levels were normalized to *Gapdh*. Data are mean ± SEM ( $n = 6$  biological replicates; \*\* $P < 0.01$ ; \*\*\* $P < 0.001$ , Student's  $t$ -test).

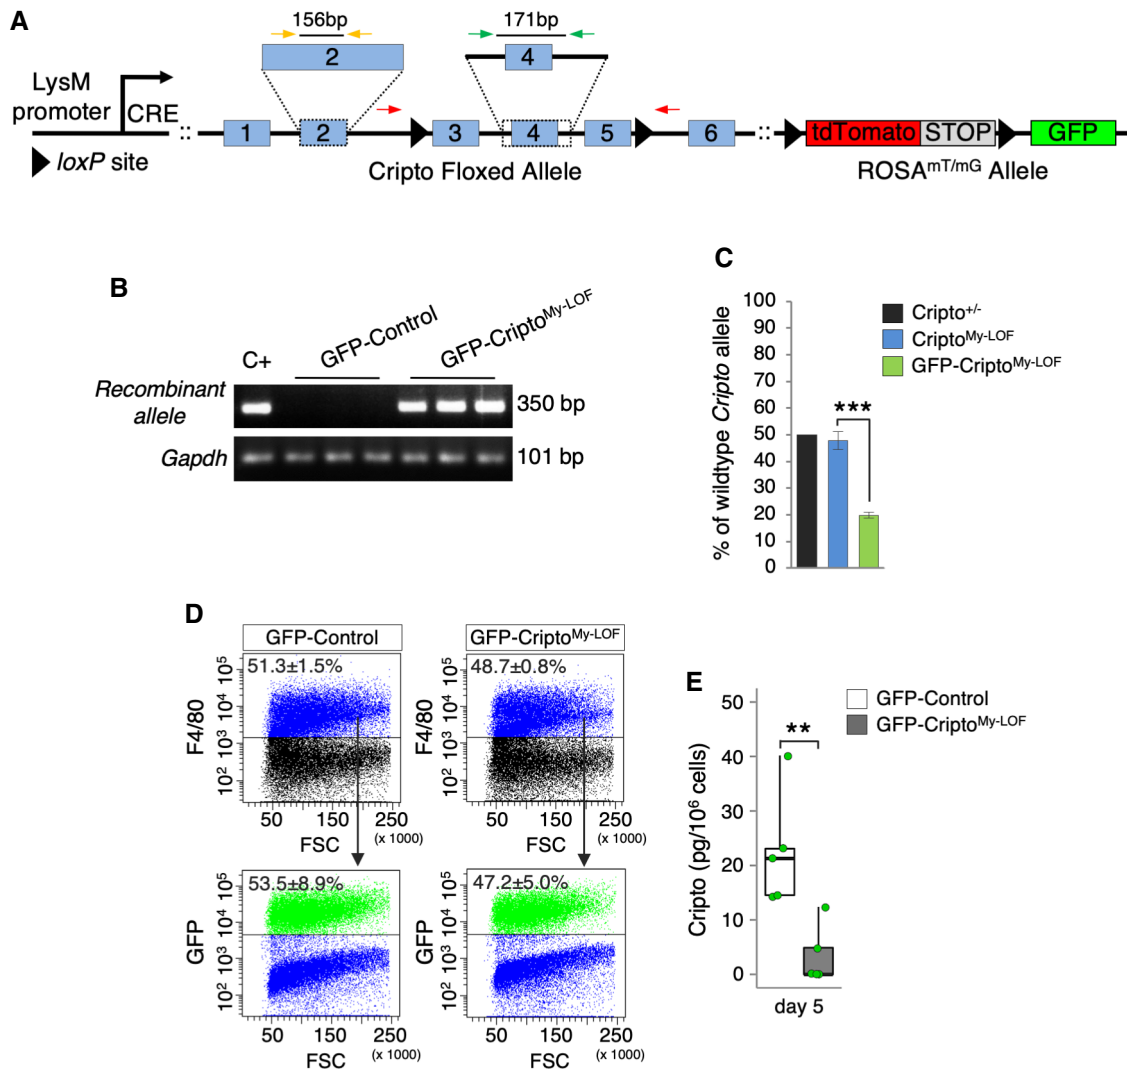

**Figure EV2. Efficiency of Cripto deletion.**

- A Schematic representation of *Tg:LysMCre::R26<sup>mTmG</sup>::Cripto<sup>fl/fl</sup>* (GFP-Cripto<sup>My-LOF</sup>) transgenic mice. Red arrows indicate forward and reverse primers used for PCR genotyping. Green arrows indicate forward and reverse primers used to amplify a DNA region encompassing exon 4. Yellow arrows indicate forward and reverse primers used to amplify exon 2, as reference PCR.
- B PCR genotyping on DNA extracted from FACS-isolated GFP<sup>+</sup> cells from GFP-Cripto<sup>My-LOF</sup> and GFP-Control mice at day 2 after injury. *Gapdh* was used as control.
- C Genomic quantitative real-time PCR (qRT-PCR) analysis of wild-type *Cripto* allele on FACS-isolated F4/80<sup>+</sup> (blue bar) or GFP<sup>+</sup> (green bar) MPs from Cripto<sup>My-LOF</sup> and GFP-Cripto<sup>My-LOF</sup> muscles, respectively, at day 2 after injury. Genomic DNA extracted from Cripto KO heterozygous mice (Cripto<sup>+/-</sup>; black bar) was used as reference of 50% *Cripto* deletion. Data are expressed as percentage of wild-type allele over the reference PCR and are mean ± SEM (*n* = 6 biological replicates; \*\*\**P* < 0.000004; Student's *t*-test).
- D Representative flow cytometry dot plots showing the percentage of F4/80<sup>+</sup> cell population and GFP<sup>+</sup> cells expressing F4/80 in GFP-Control and GFP-Cripto<sup>My-LOF</sup> muscles at day 2 after injury. Data are mean ± SEM (*n* = 4 biological replicates; *P* = ns; Student's *t*-test).
- E ELISA-based assay of Cripto protein from total protein extracts of FACS-sorted GFP<sup>+</sup> MPs from GFP-Control and GFP-Cripto<sup>My-LOF</sup> muscles at day 5 after injury. Data are expressed as box plots displaying minimum, first quartile, median, third quartile, and maximum (*n* = 5 biological replicates; \*\**P* < 0.01; Student's *t*-test).

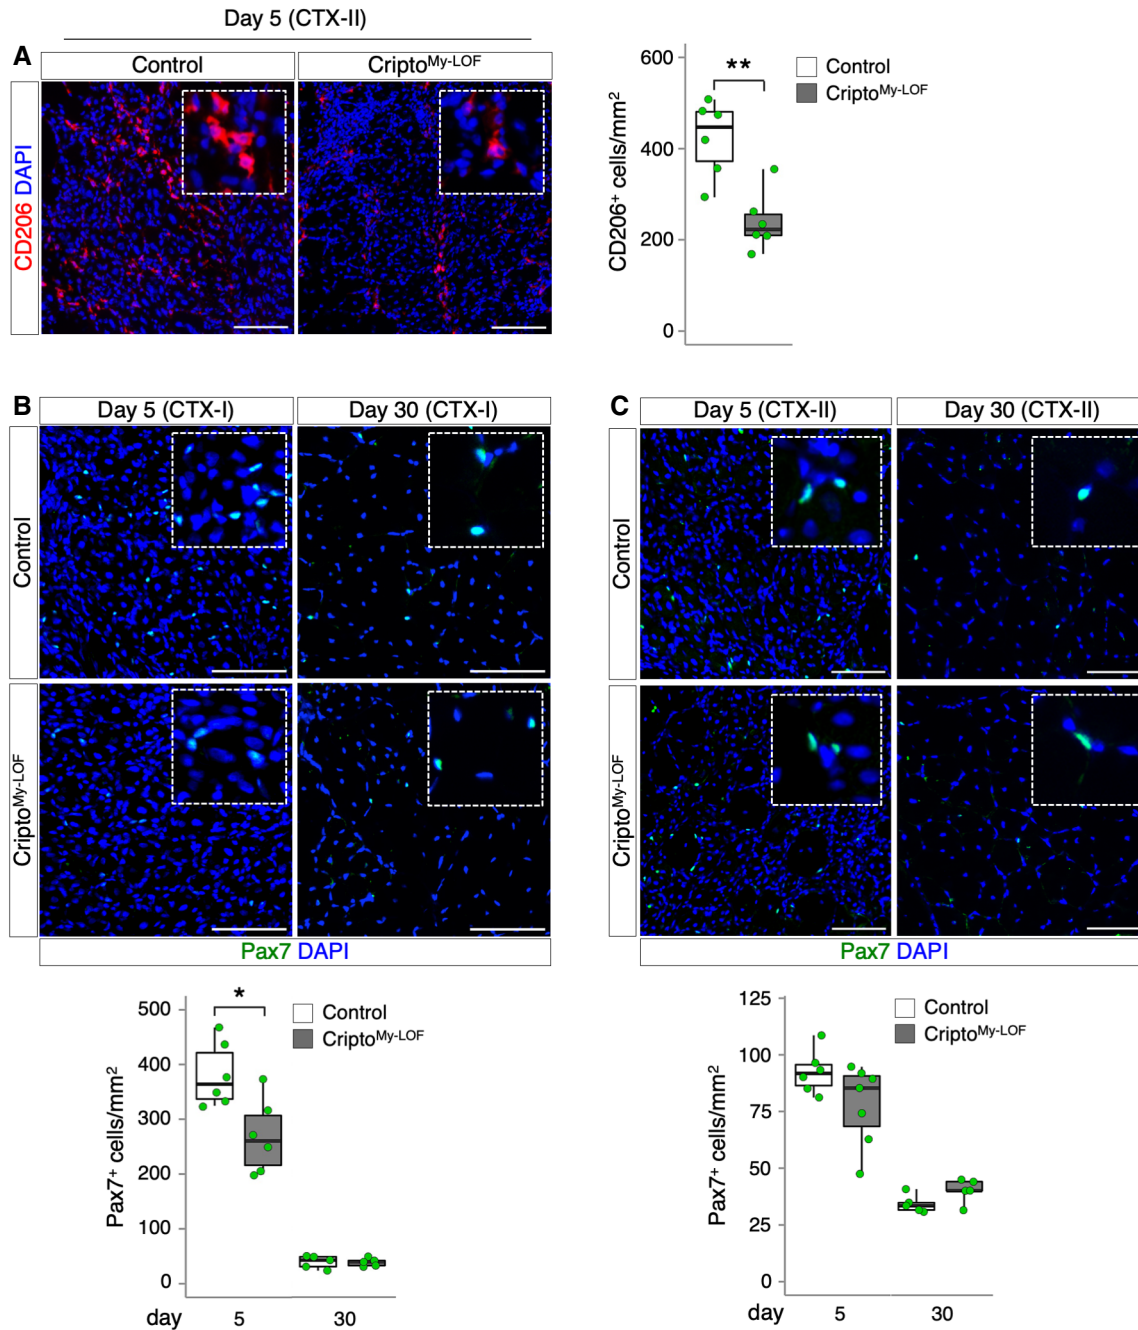

**Figure EV3.** Effect of Cripto<sup>My-LOF</sup> on CD206<sup>+</sup> MPs and Pax7<sup>+</sup> satellite cells in acute injury.

- A** Representative pictures of CD206 (red) immunostaining of Cripto<sup>My-LOF</sup> and Control TA sections at day 5 after re-injury (left panel) and quantification of CD206<sup>+</sup> cells per area (mm<sup>2</sup>, right panel). Data are expressed as box plots displaying minimum, first quartile, median, third quartile, and maximum ( $n = 6$  biological replicates;  $**P < 0.01$ ; Student's  $t$ -test).
- B** Representative pictures of Pax7 (green) immunostaining of Cripto<sup>My-LOF</sup> and Control TA sections at days 5 (left panel) and 30 (right panel) after injury (CTX-I) and quantification of Pax7<sup>+</sup> cell number per area (mm<sup>2</sup>). Data are expressed as box plots displaying minimum, first quartile, median, third quartile, and maximum ( $n \geq 5$  biological replicates;  $*P < 0.05$ ; Student's  $t$ -test).
- C** Representative pictures of Pax7 (green) immunostaining of Cripto<sup>My-LOF</sup> and Control TA sections at days 5 (left panel) and 30 (right panel) after re-injury (CTX-II) and quantification of Pax7<sup>+</sup> cell number per area (mm<sup>2</sup>). Data are expressed as box plots displaying minimum, first quartile, median, third quartile, and maximum ( $n \geq 5$  biological replicates;  $P = ns$ ; Student's  $t$ -test). Data information: Nuclei were counterstained with DAPI (blue). Scale bar: 100  $\mu$ m. Magnification of the boxes is 3.5 $\times$ .

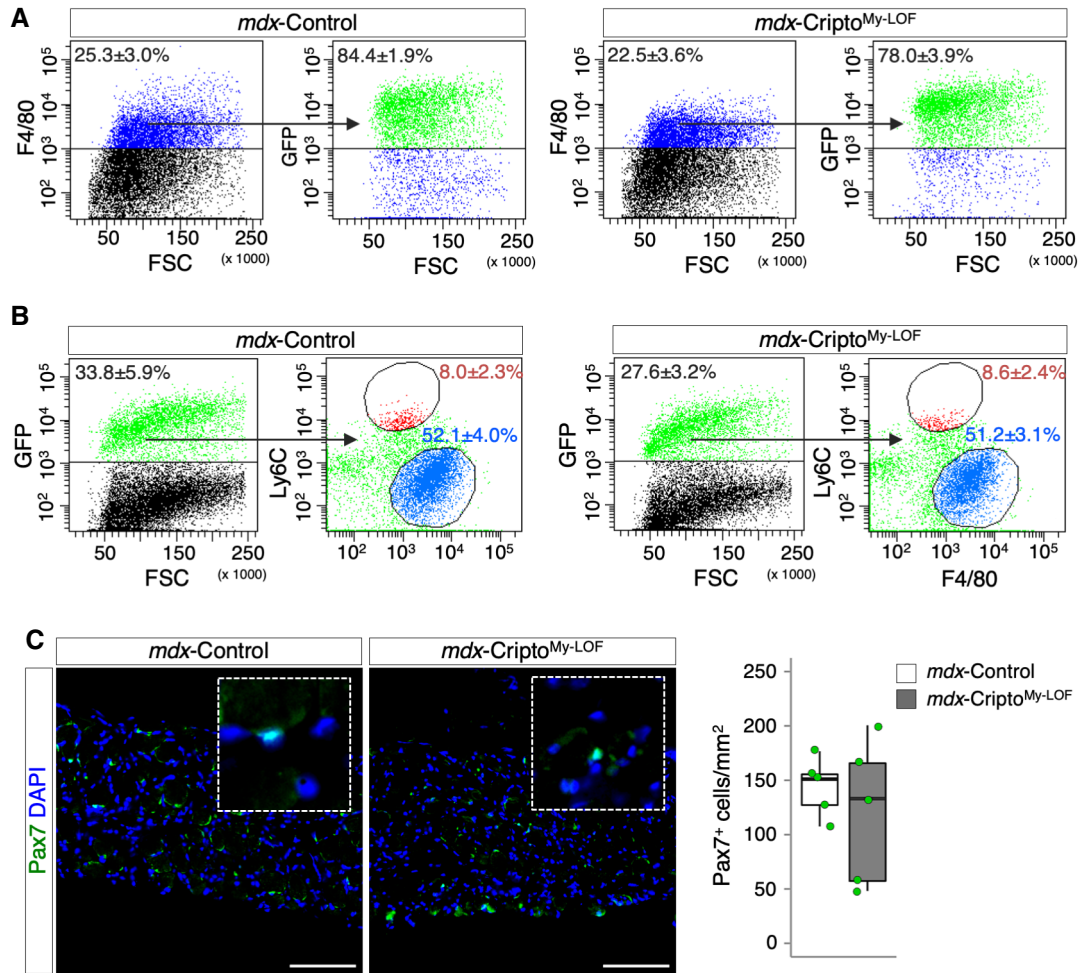

**Figure EV4. Cripto<sup>My-LOF</sup> does not affect Ly6C<sup>high/Low</sup> distribution and satellite cells number in mdx mice.**

A Representative FACS scatter plots showing the percentage of GFP<sup>+</sup> gated on the F4/80<sup>+</sup> cell population in *mdx-Control* and *mdx-Cripto<sup>My-LOF</sup>* muscles. Data are mean ± SEM [*n* = 3 biological replicates (*mdx-Control*) and *n* = 5 biological replicates (*mdx-Cripto<sup>My-LOF</sup>*); *P* = ns; Student's *t*-test].

B Representative flow cytometry dot plots showing GFP<sup>+</sup> and GFP<sup>+</sup>/F4/80<sup>+</sup>/Ly6C<sup>Low/High</sup> cell populations in *mdx-Control* and *mdx-Cripto<sup>My-LOF</sup>* muscles. Data are mean ± SEM [*n* = 3 (*mdx-Control*) and *n* = 5 biological replicates (*mdx-Cripto<sup>My-LOF</sup>*); *P* = ns; Student's *t*-test].

C Representative pictures of Pax7 (green) immunostaining of *mdx-Cripto<sup>My-LOF</sup>* and *mdx-Control* diaphragm sections (left panels) and quantification of Pax7<sup>+</sup> cell number per area (mm<sup>2</sup>, right panels). Nuclei were counterstained with DAPI (blue). Scale bar: 100 μm. Magnification of the boxes is 3.5×. Data are expressed as box plots displaying minimum, first quartile, median, third quartile, and maximum (*n* = 5 biological replicates; *P* = ns; Student's *t*-test).

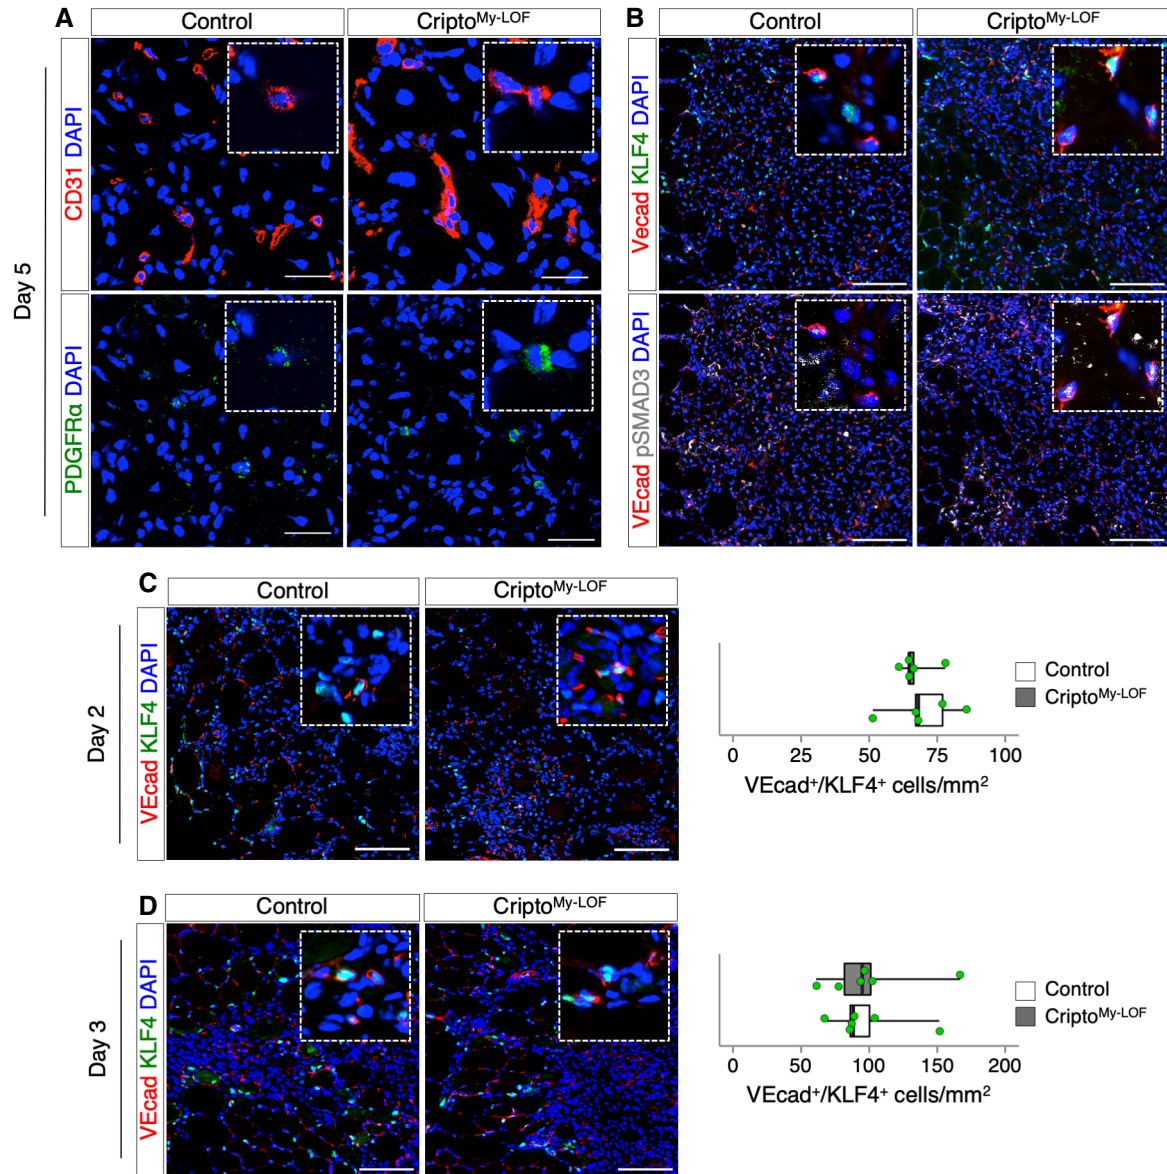

**Figure EV5. Cripto<sup>My-LOF</sup> affects endothelial plasticity in injured skeletal muscle.**

- A Representative confocal pictures of double immunostaining with CD31 (red) and PDGFR $\alpha$  (green) on Control and Cripto<sup>My-LOF</sup> TA sections at day 5 after injury. Split green and red channels of Fig 7E are shown.
- B Representative pictures of triple immunostaining with VECad (red), KLF4 (green), and pSMAD3 (white) on Control and Cripto<sup>My-LOF</sup> TA sections at day 5 after injury. Merged channels of VECad/KLF4 (top panels) and VECad/pSMAD3 of Fig 7H are shown.
- C, D Representative pictures of double immunostaining with VECad (red) and KLF4 (green) on Control and Cripto<sup>My-LOF</sup> TA sections at day 2 (C, left panels) and day 3 (D, left panels) after injury and quantification of VECad/KLF4 double-positive cells per area (mm<sup>2</sup>) at day 2 (C, right panel) and day 3 (D, right panel).

Data information: Nuclei were counterstained with DAPI (blue). Scale bar: 100  $\mu$ m. Confocal pictures (A) scale bar: 25  $\mu$ m. Magnification of the boxes is 3.5 $\times$ . Data are expressed as box plots displaying minimum, first quartile, median, third quartile, and maximum ( $n \geq 5$  biological replicates;  $P = ns$ ; Student's  $t$ -test).
